# Supplementary material
Source: Springer Nature journal article supplement (https://publikationen.ub.uni-frankfurt.de/opus4/files/1518/12896_2006_189_MOESM3_ESM.pdf)

**A**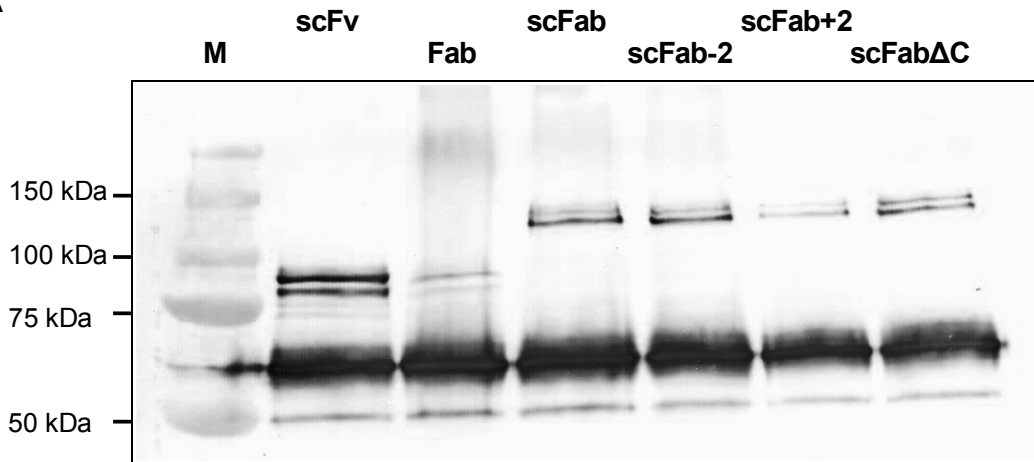**B**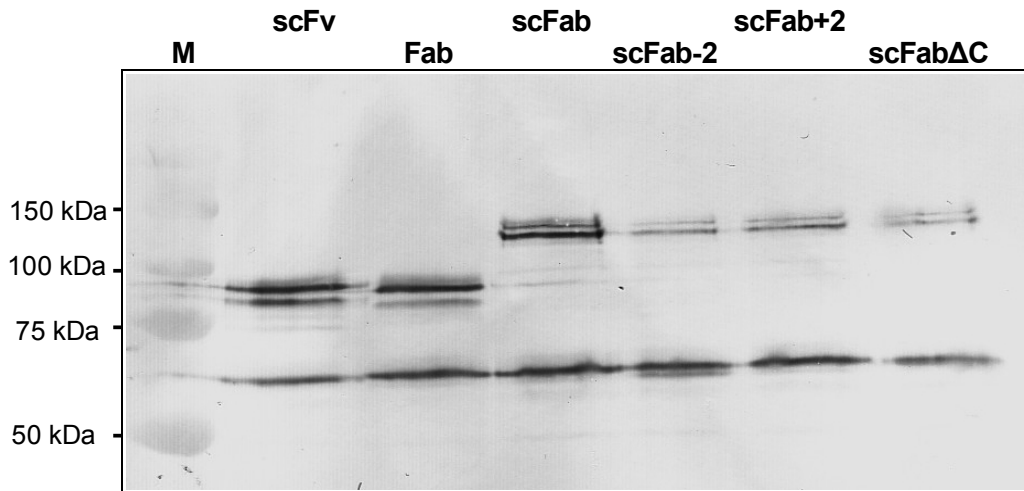

Supplement: MOESM3 [file 12896_2006_189_MOESM3_ESM.pdf]
